# Supplementary material for: Gold nanoparticles alter Taq DNA polymerase activity during polymerase chain reaction
Source: Royal Society of Chemistry journal article supplement (doi:10.1039/c3ra41882k), 2013-01-01
Supplement: c3ra41882k.pdf [file c3ra41882k.pdf]

# **Influence of gold nanoparticles on Taq DNA polymerase activity during polymerase chain reaction**

**Running Title:** Gold nanoparticles modulating Taq polymerase activity

**Samir Mandal<sup>†</sup>, Maidul Hossain<sup>‡</sup>, Murugan<sup>†</sup>, Gopinatha Suresh Kumar<sup>‡</sup>  
and Keya Chaudhuri<sup>†\*</sup>**

<sup>†</sup>Molecular and Human Genetics Division and <sup>‡</sup>Biophysical Chemistry Laboratory

CSIR-Indian Institute of Chemical Biology, Kolkata 700032, India

\*Corresponding author

Dr. Keya Chaudhuri

Molecular and Human Genetics Division

CSIR-Indian Institute of Chemical Biology

4, Raja S.C. Mullick Road, Kolkata-700 032, India.

Tel: 91-33-2473-0350; Fax: 91-33-2473-5197

Email: keya.chaudhuri@gmail.com

kchaudhuri@iicb.res.in

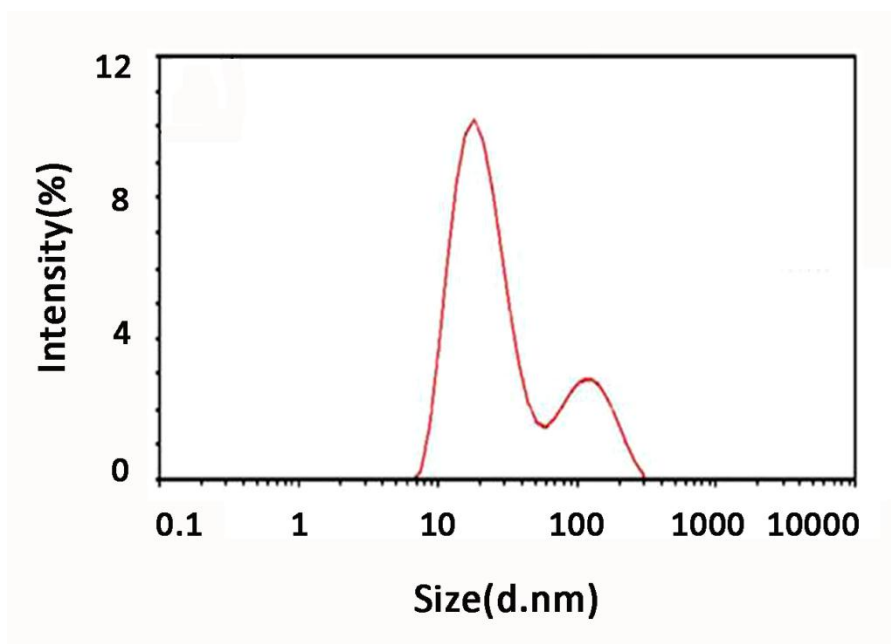

**Figure S1** Size distribution curve of GNPs by DLS

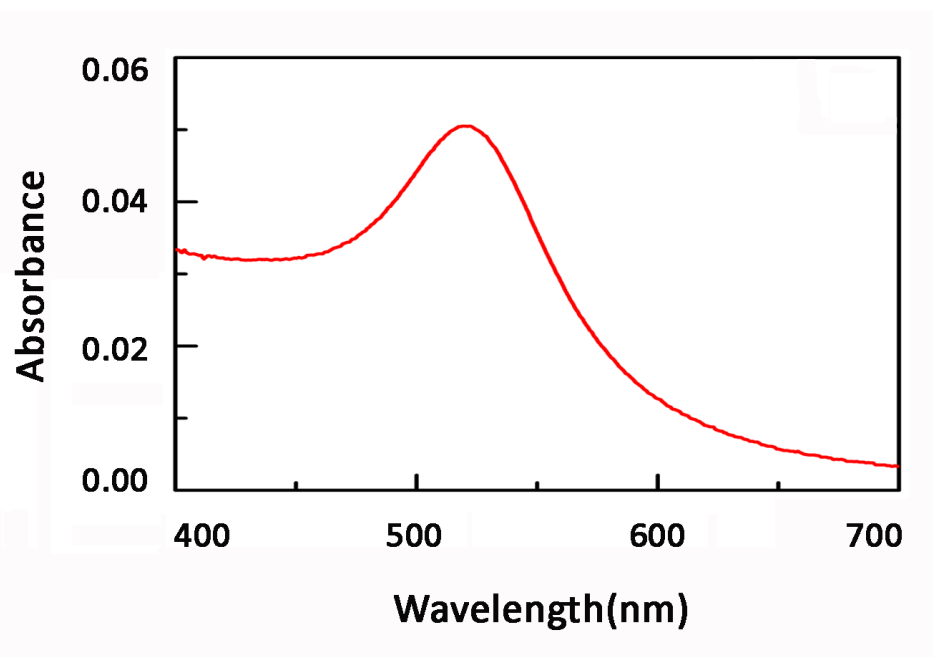

**Figure S2** UV-visible spectra of GNPs.

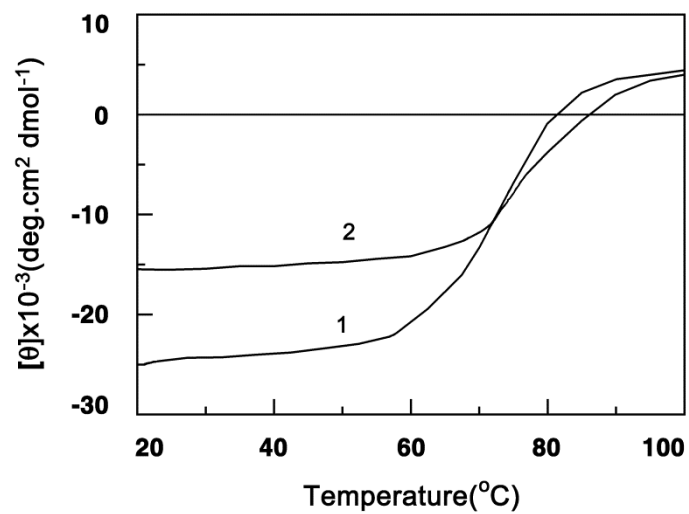

**Figure S3** CD melting study with 67 nm GNP. Curve 1 represents the melting curve of taq DNA polymerase without GNPs and that of 2 with GNPs.
